# Supplementary material
Source: Springer Nature journal article supplement (https://www.springermedizin.de/resource/supplementary/12903_2014_423_MOESM1_ESM.pdf/9517012)

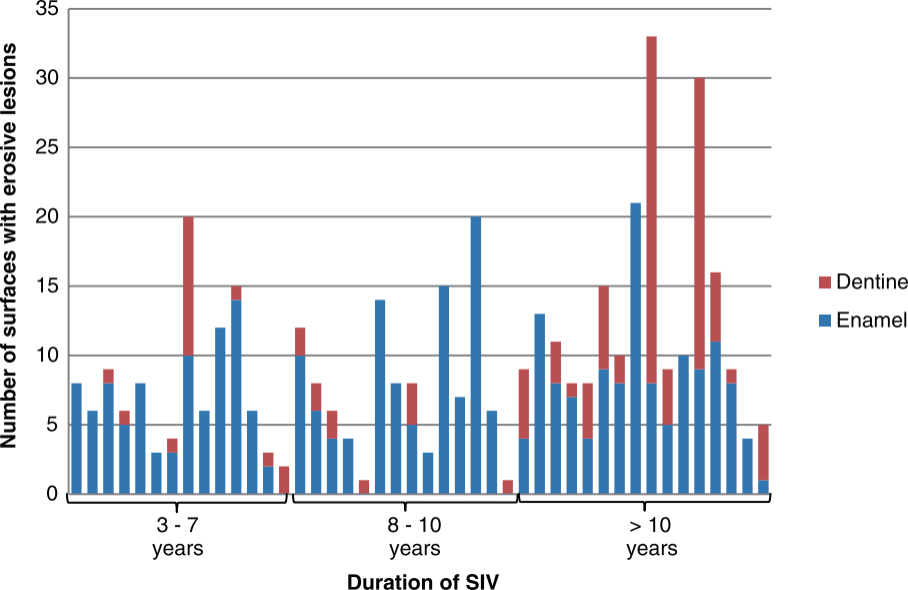

Supplement: MOESM1 [file 9517012]
